# Supplementary material for: Transition metal complexes of antimony centered ligands based upon acenaphthyl scaffolds. Coordination non-innocent or not?
Source: Royal Society of Chemistry journal article supplement (doi:10.1039/c9dt00088g), 2019-01-01
Supplement: c9dt00088g1.pdf [file c9dt00088g1.pdf]

**Dalton Transactions - Full Article**

**Transition Metal Complexes of Antimony Centered Ligands based upon Acenaphthyl  
Scaffolds. Coordination Non-Innocent or Not?**

Sinas Furan,<sup>a</sup> Emanuel Hupf,<sup>a</sup> Julian Boidol,<sup>a</sup> Julian Brünig,<sup>a</sup> Enno Lork,<sup>a</sup>

Stefan Mebs,<sup>b</sup>\* Jens Beckmann<sup>a</sup>\*

<sup>a</sup> *Institut für Anorganische Chemie, Universität Bremen, Leobener Straße 7, 28359 Bremen,  
Germany*

<sup>b</sup> *Institut für Experimentalphysik, Freie Universität Berlin, Arnimallee 14, 14195 Berlin,  
Germany*

Received

**Supporting Information**

---

\* Correspondence to Jens Beckmann (E-mail: [j.beckmann@uni-bremen.de](mailto:j.beckmann@uni-bremen.de)) and Stefan Mebs (E-mail: [steb@chemie.fu-berlin.de](mailto:steb@chemie.fu-berlin.de))

## Table of Contents

|                       |                                                                                                  |
|-----------------------|--------------------------------------------------------------------------------------------------|
| <b>Figures S1a-c.</b> | NMR spectra of <b>1</b>                                                                          |
| <b>Figures S2a-c.</b> | NMR spectra of <b>2</b>                                                                          |
| <b>Figures S3a-c.</b> | NMR spectra of <b>3</b>                                                                          |
| <b>Figures S4a-c.</b> | NMR spectra of <b>4</b>                                                                          |
| <b>Figures S5a-c.</b> | NMR spectra of <b>5</b>                                                                          |
| <b>Figures S6a-c.</b> | NMR spectra of <b>6</b>                                                                          |
| <b>Figures S6d.</b>   | UV/Vis spectrum of <b>6</b>                                                                      |
| <b>Table S1.</b>      | Selected interatomic distances (Å) and angles (°) of <b>1</b> and <b>2</b>                       |
| <b>Figure S7.</b>     | AIM topologies, NCI <i>iso</i> -surfaces and ELI-D <i>iso</i> -surfaces of <b>1</b> and <b>2</b> |
| <b>Figure S8.</b>     | AIM topologies, NCI <i>iso</i> -surfaces and ELI-D <i>iso</i> -surfaces of <b>5</b>              |
| <b>Figure S9.</b>     | AIM topologies, NCI <i>iso</i> -surfaces and ELI-D <i>iso</i> -surfaces of <b>6</b>              |

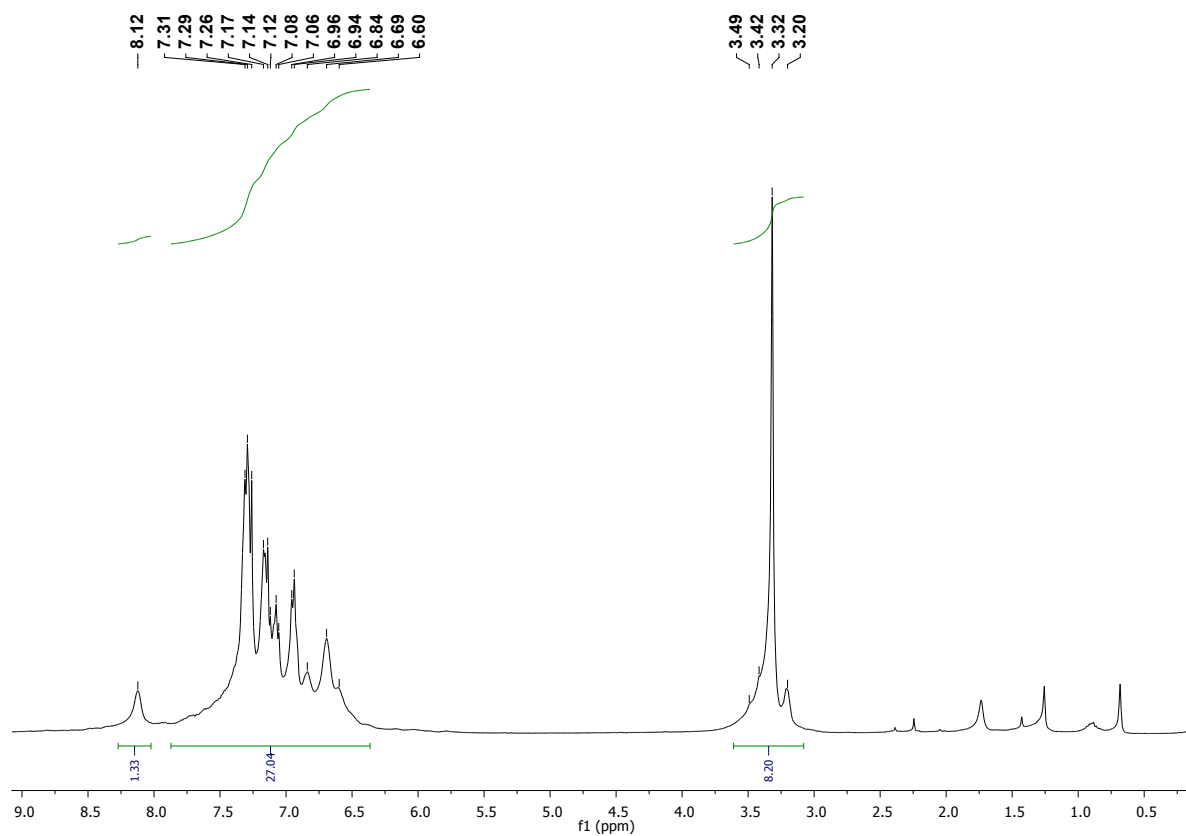

**Figure S1a.**  $^1\text{H}$ -NMR spectrum ( $\text{CDCl}_3$ ) of **1**.

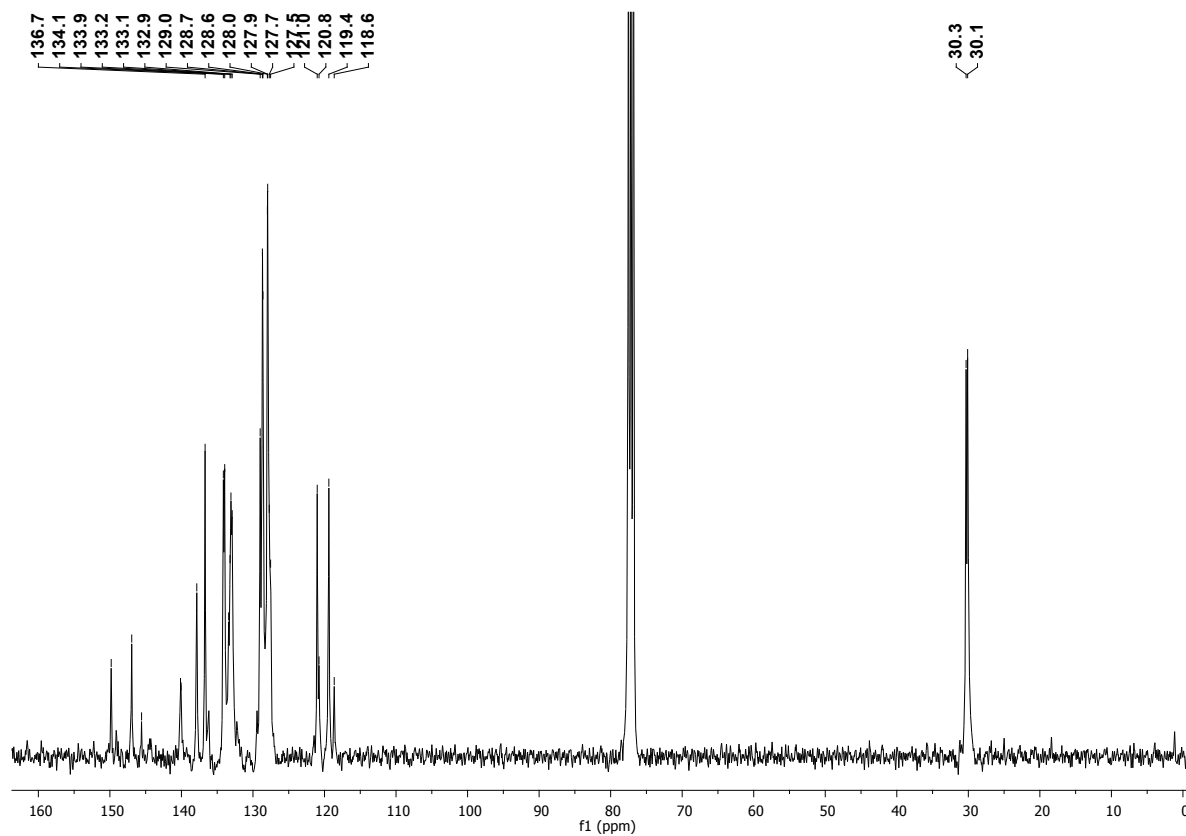

**Figure S1b.**  $^{13}\text{C}\{^1\text{H}\}$ -NMR spectrum ( $\text{CDCl}_3$ ) of **1**.

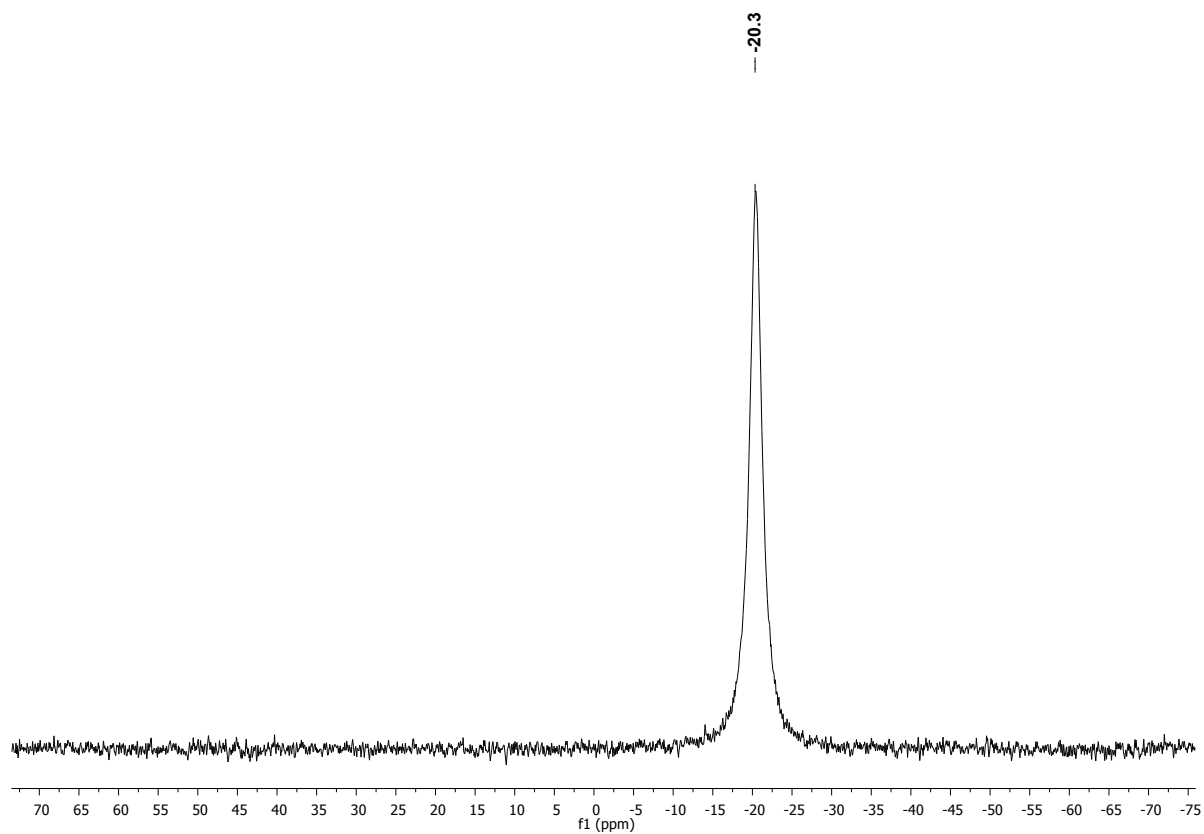

Figure S1c. <sup>31</sup>P{<sup>1</sup>H}-NMR spectrum (CDCl<sub>3</sub>) of 1.

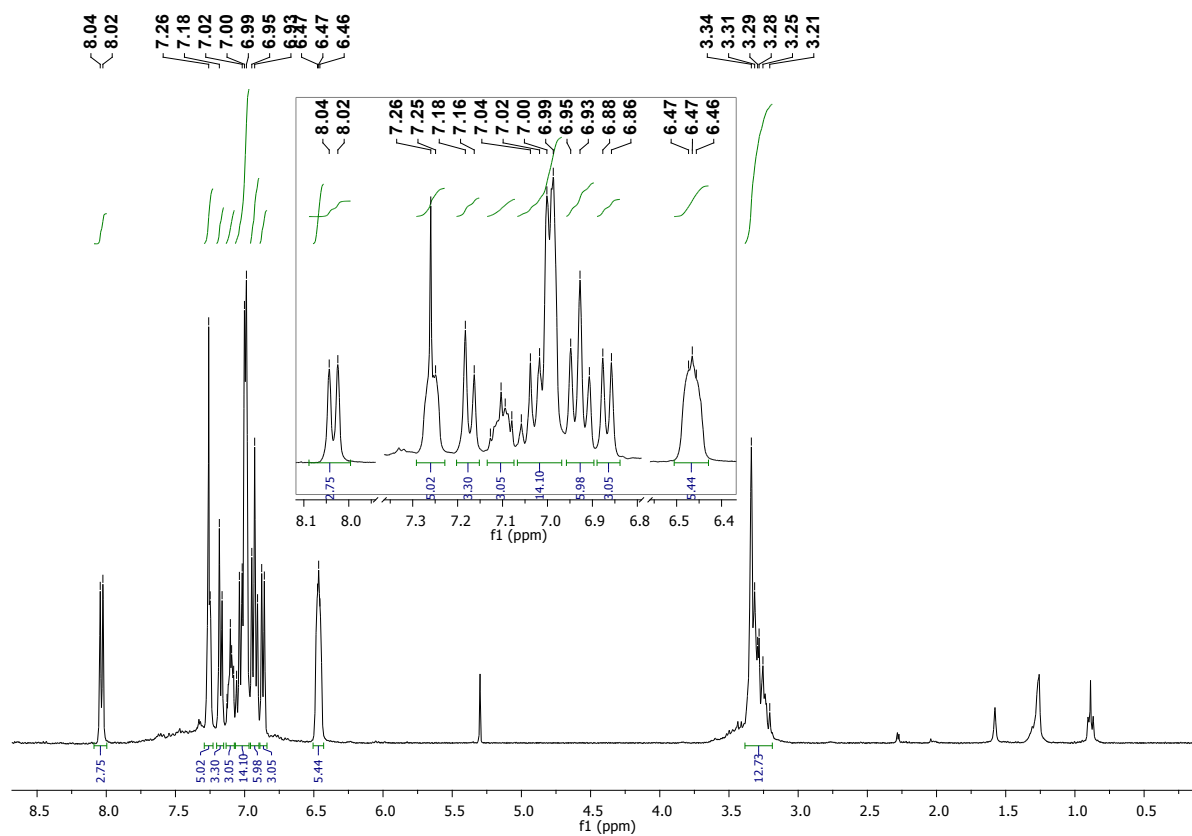

Figure S2a. <sup>1</sup>H-NMR spectrum (CDCl<sub>3</sub>) of 2.

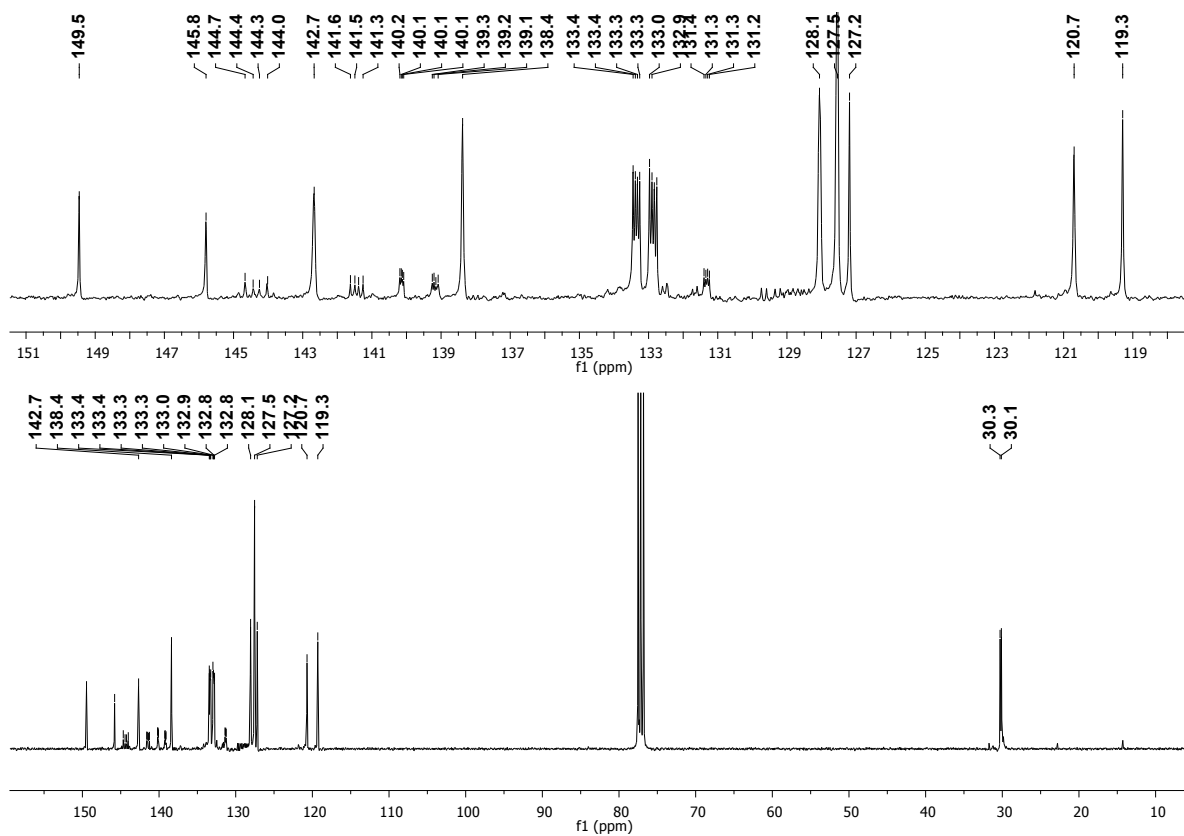

**Figure S2b.**  $^{13}\text{C}\{^1\text{H}\}$ -NMR spectrum ( $\text{CDCl}_3$ ) of **2**.

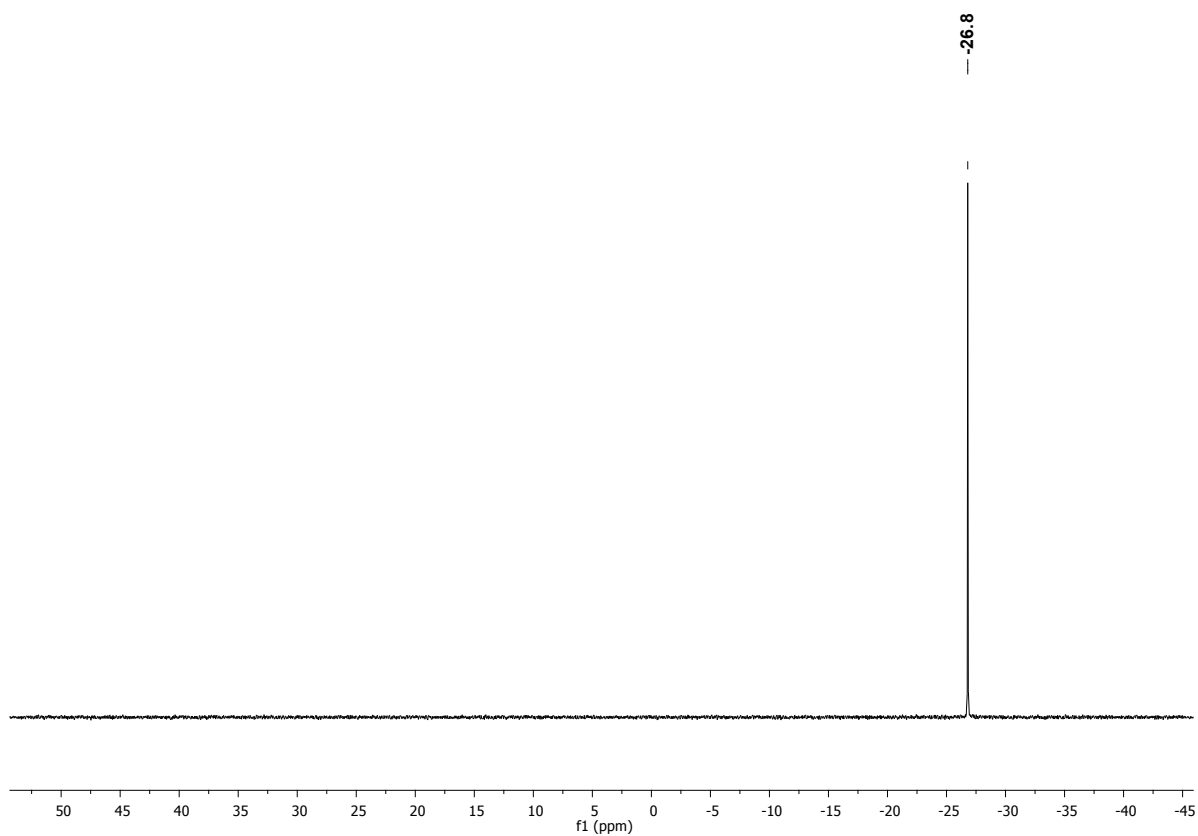

**Figure S2c.**  $^{31}\text{P}\{^1\text{H}\}$ -NMR spectrum ( $\text{CDCl}_3$ ) of **2**.

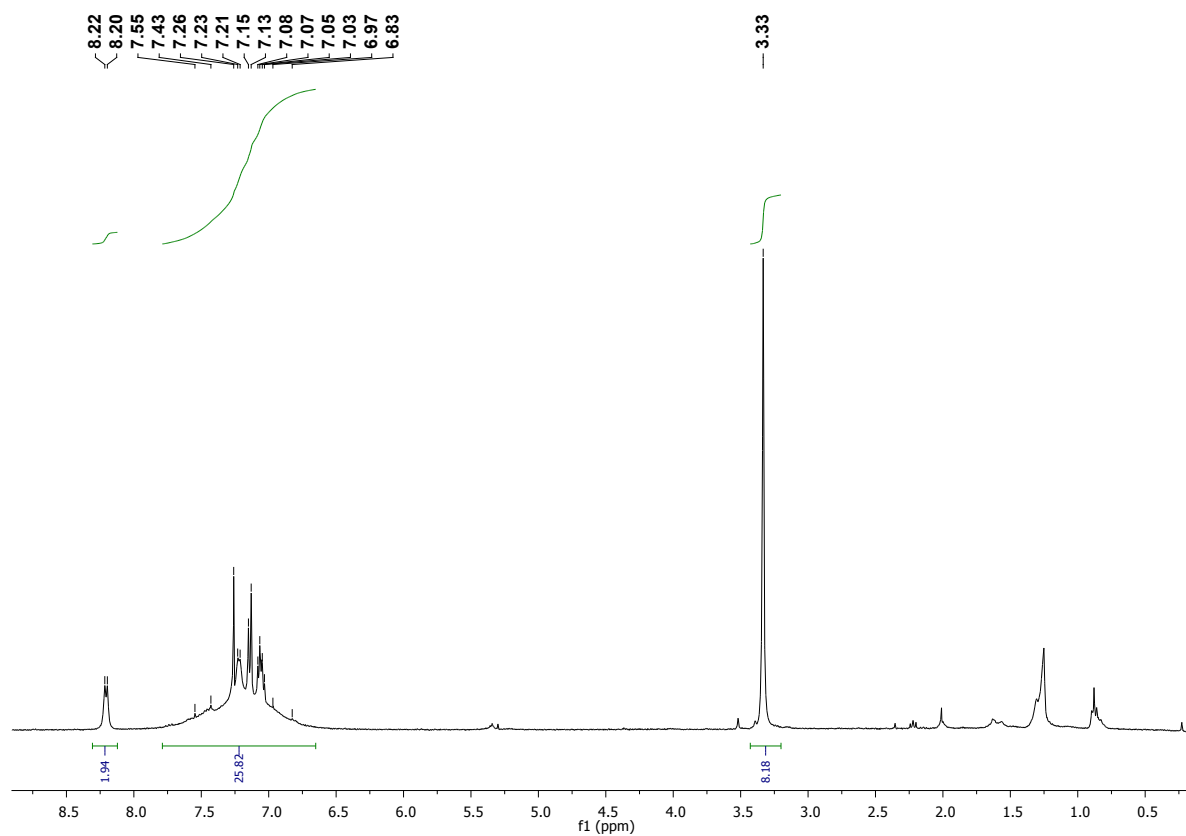

**Figure S3a.**  $^1\text{H}$ -NMR spectrum ( $\text{CDCl}_3$ ) of **3**.

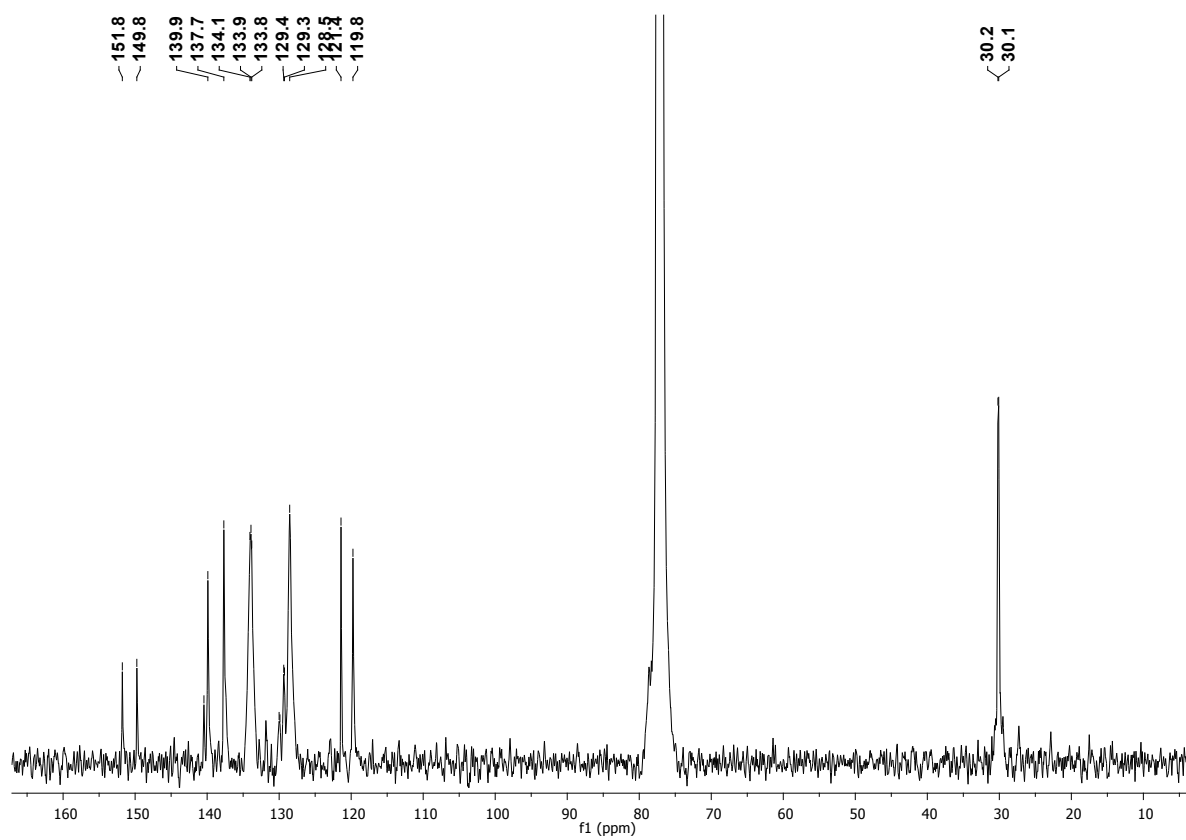

**Figure S3b.**  $^{13}\text{C}\{^1\text{H}\}$ -NMR spectrum ( $\text{CDCl}_3$ ) of **3** (poor solubility, acquisition time 48 h).

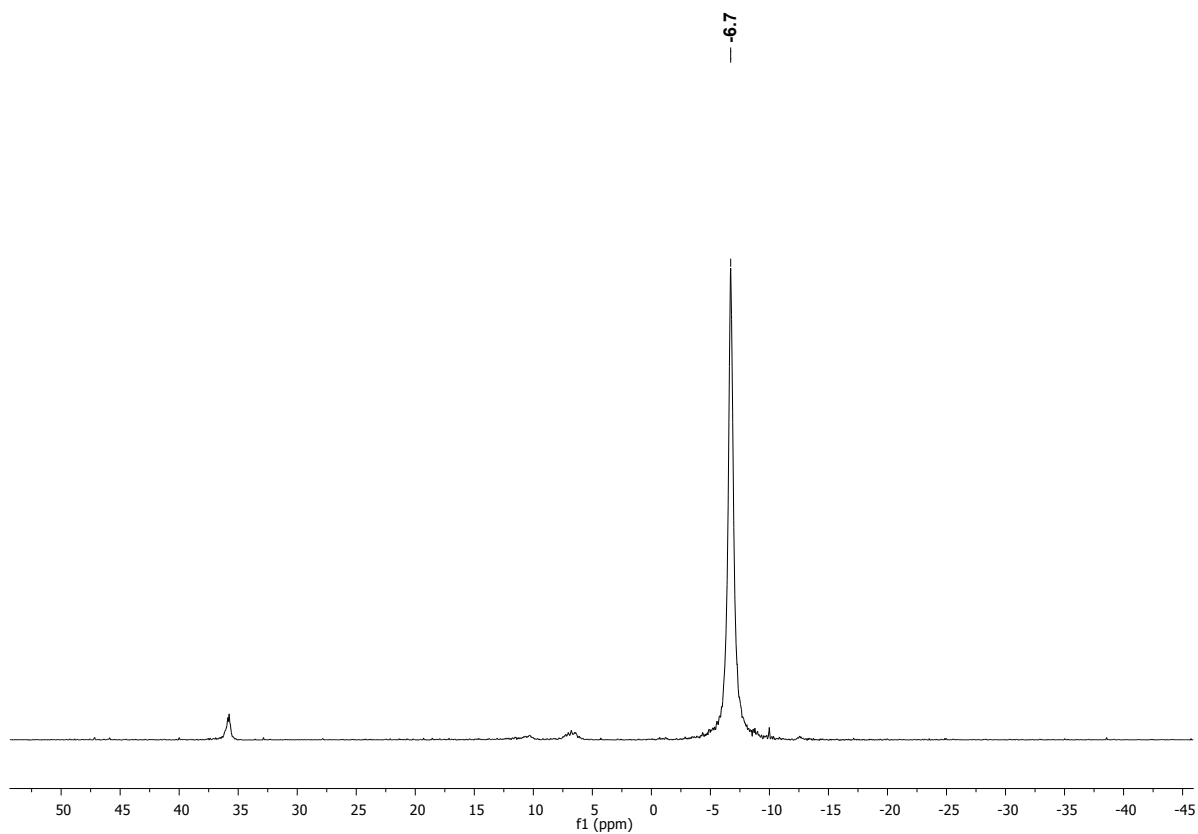

**Figure S3b.** <sup>31</sup>P{<sup>1</sup>H}-NMR spectrum (CDCl<sub>3</sub>) of 3 (poor solubility, acquisition time 12 h).

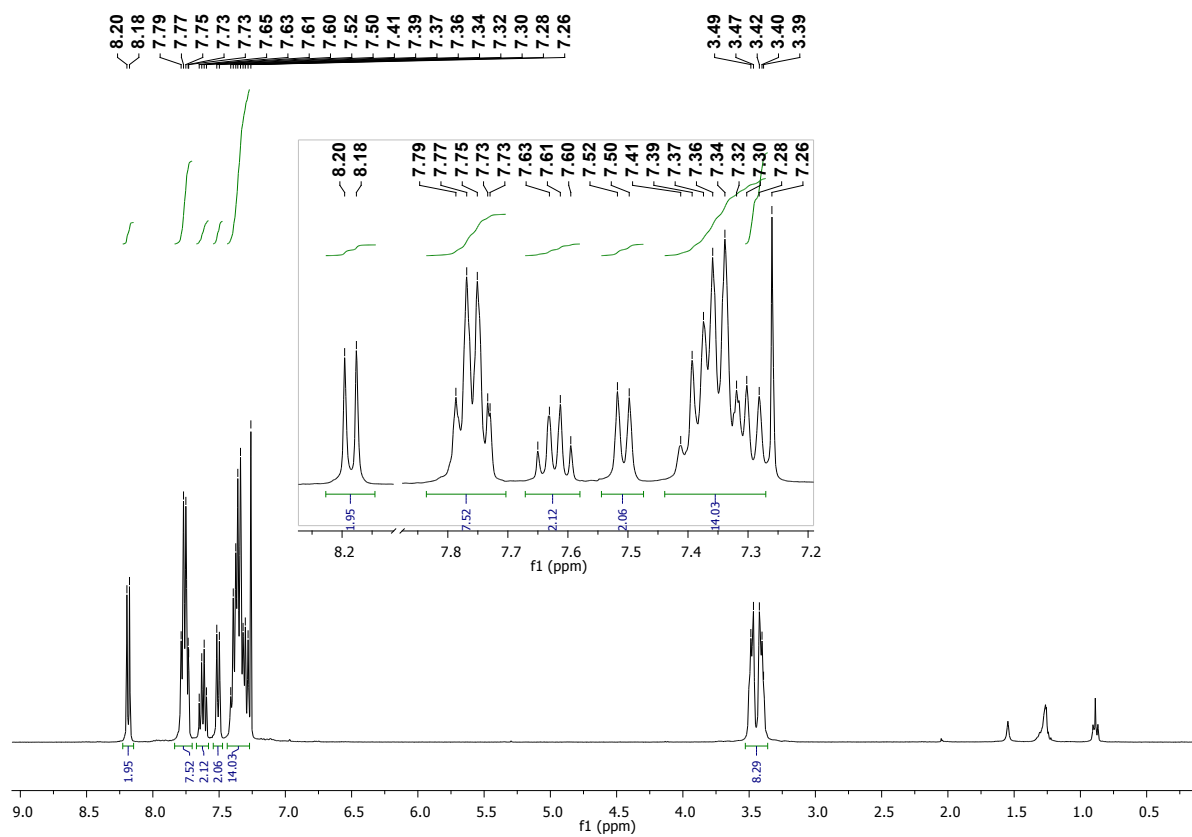

**Figure S4a.** <sup>1</sup>H-NMR spectrum (CDCl<sub>3</sub>) of 4.

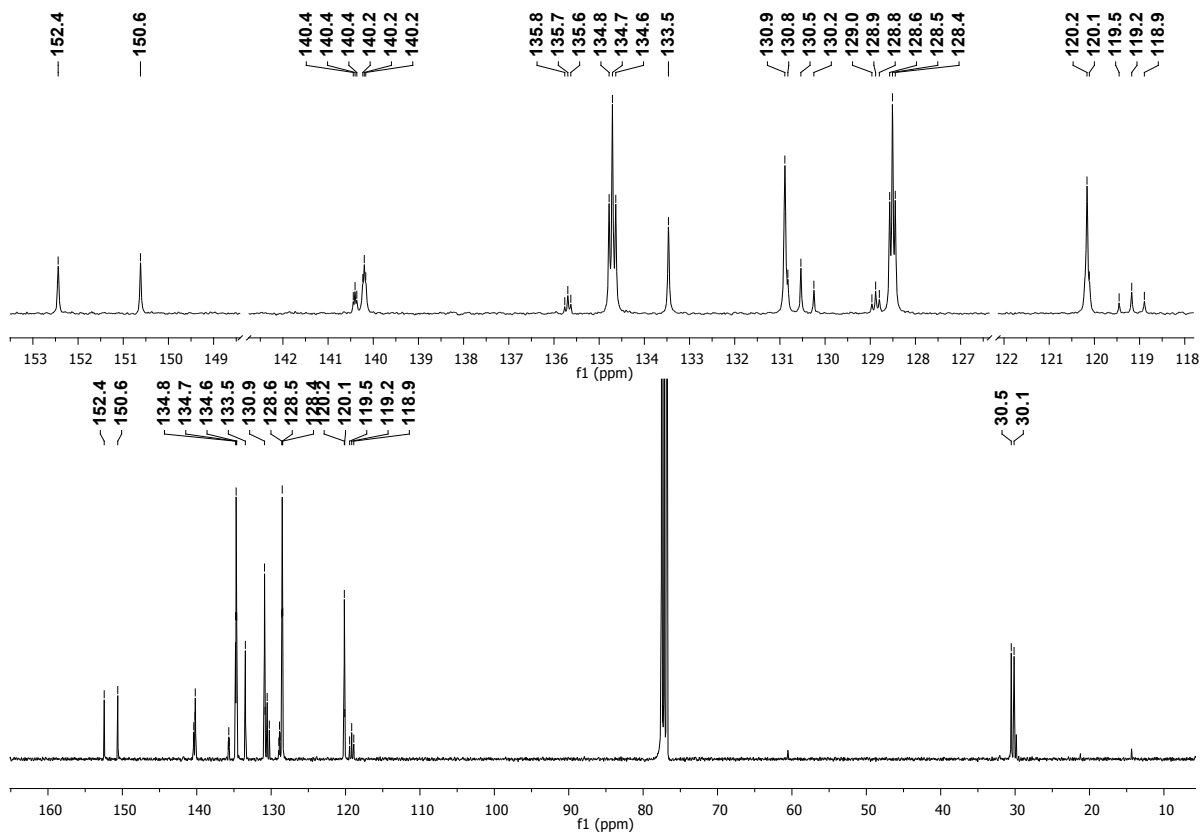

**Figure S4b.**  $^{13}\text{C}\{^1\text{H}\}$ -NMR spectrum ( $\text{CDCl}_3$ ) of 4.

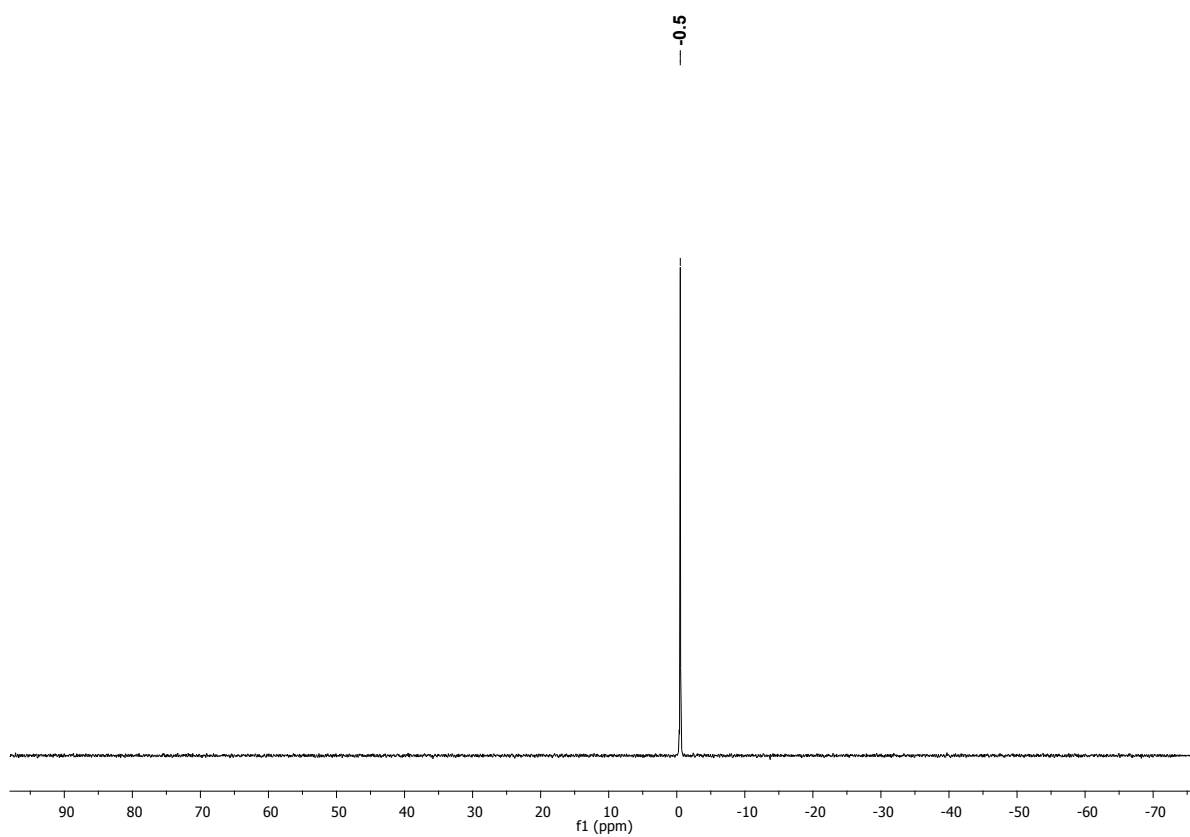

**Figure S4c.**  $^{31}\text{P}\{^1\text{H}\}$ -NMR spectrum ( $\text{CDCl}_3$ ) of 4.



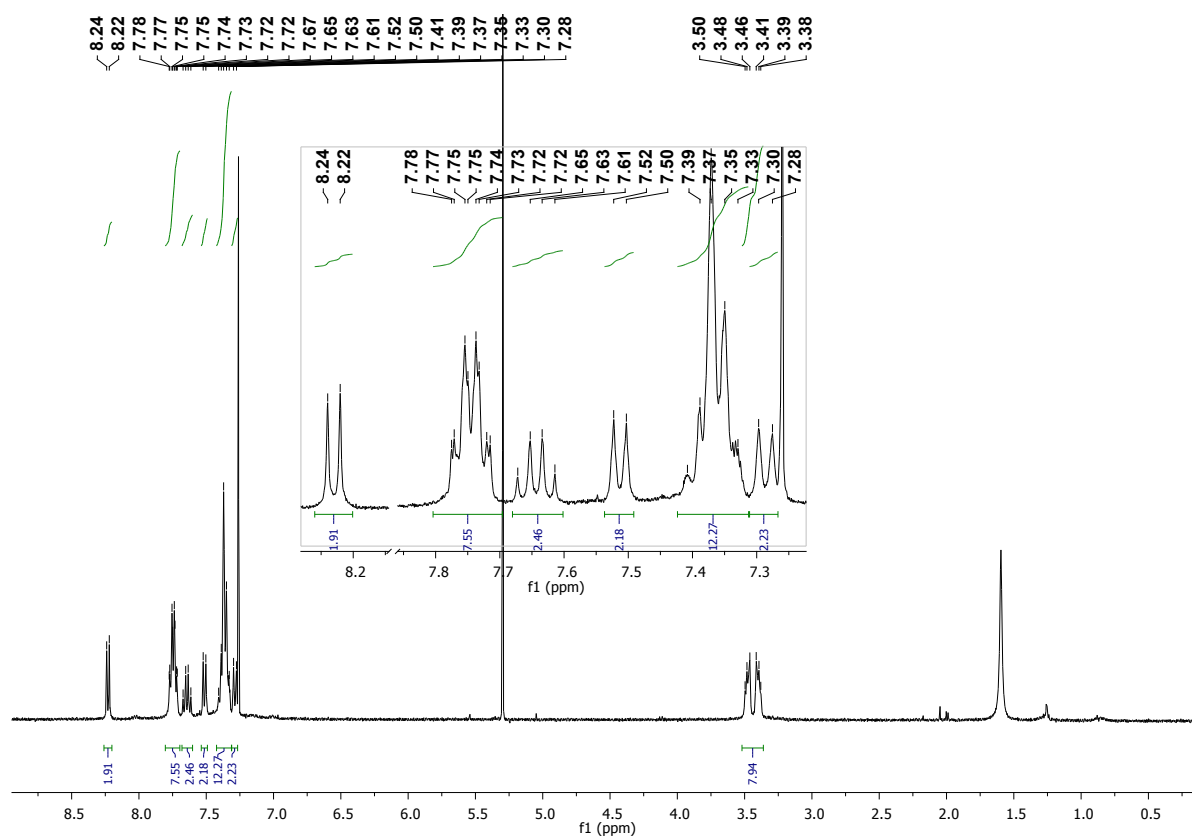

**Figure S5a.**  $^1\text{H}$ -NMR spectrum ( $\text{CDCl}_3$ ) of **5**.

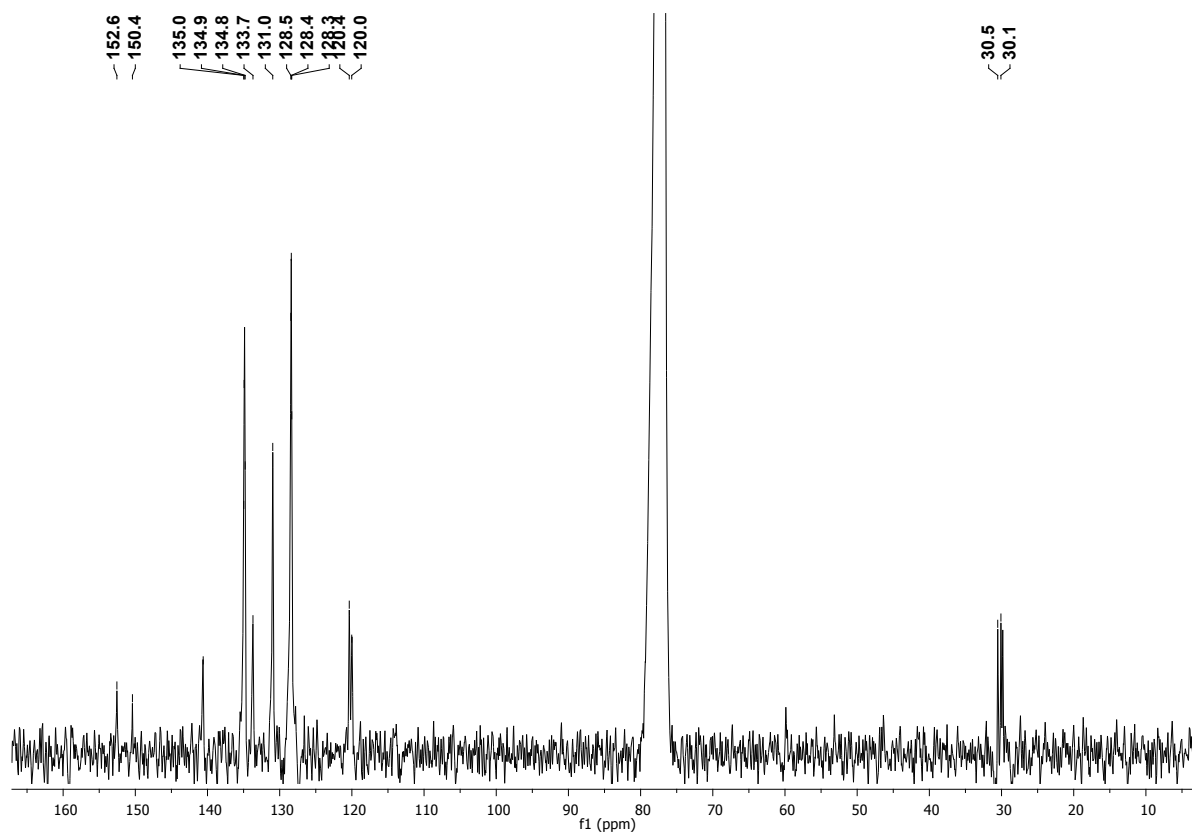

**Figure S5b.**  $^{13}\text{C}\{^1\text{H}\}$ -NMR spectrum ( $\text{CDCl}_3$ ) of **5** (poor solubility, acquisition time 72 h).

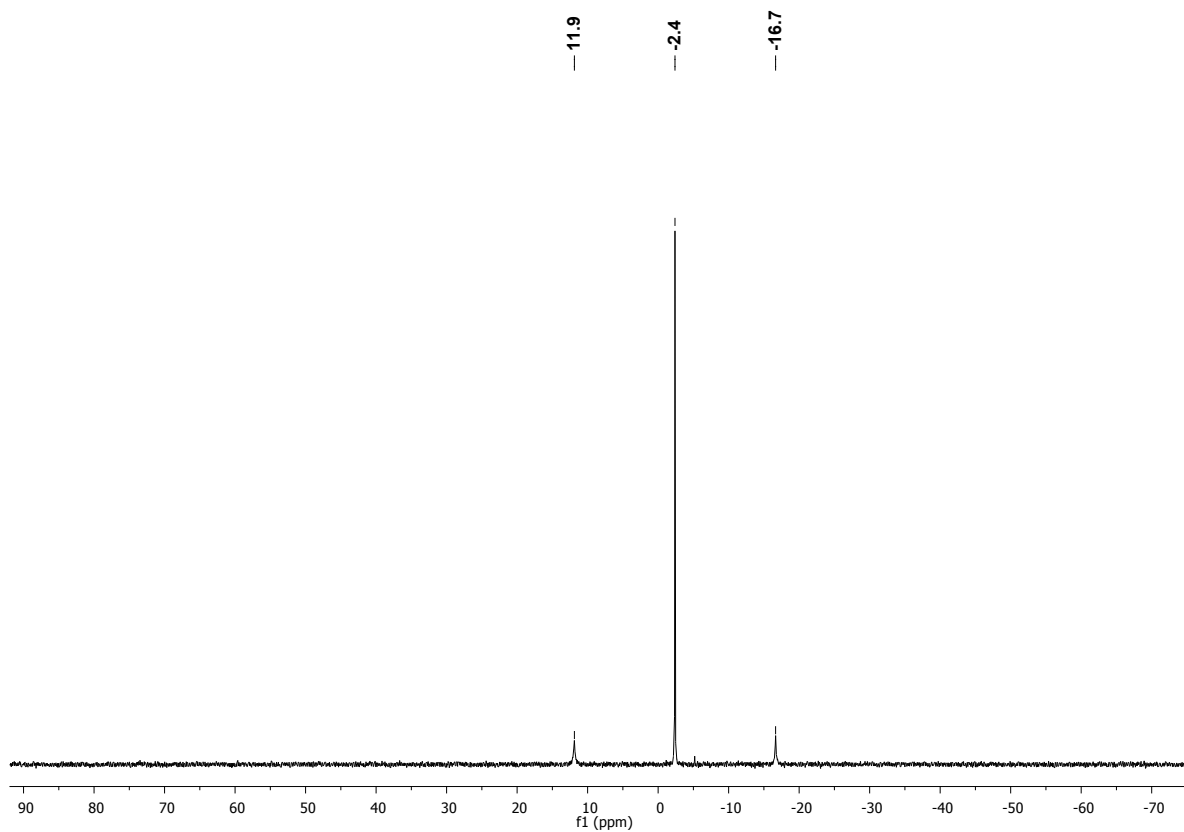

Figure S5c. <sup>31</sup>P{<sup>1</sup>H}-NMR spectrum (CDCl<sub>3</sub>) of 5.

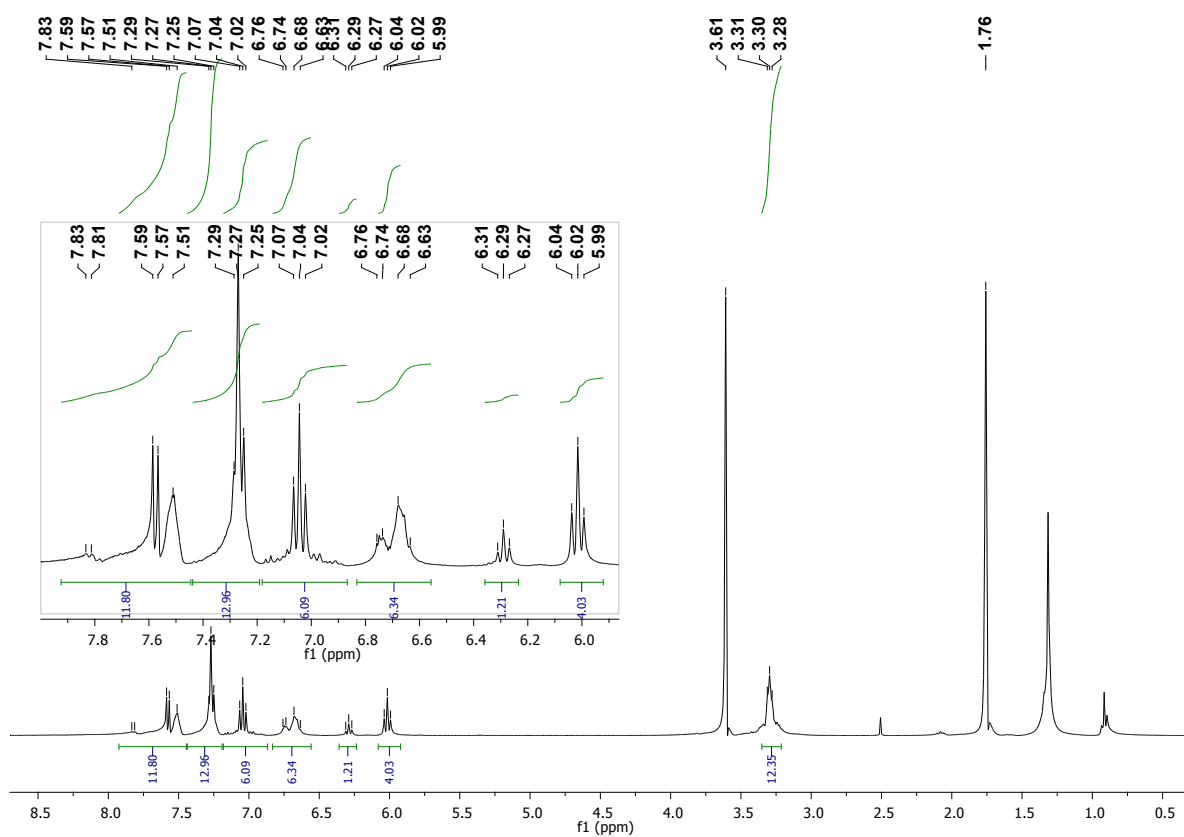

Figure S6a. <sup>1</sup>H-NMR spectrum (THF-d<sub>8</sub>) of 6.

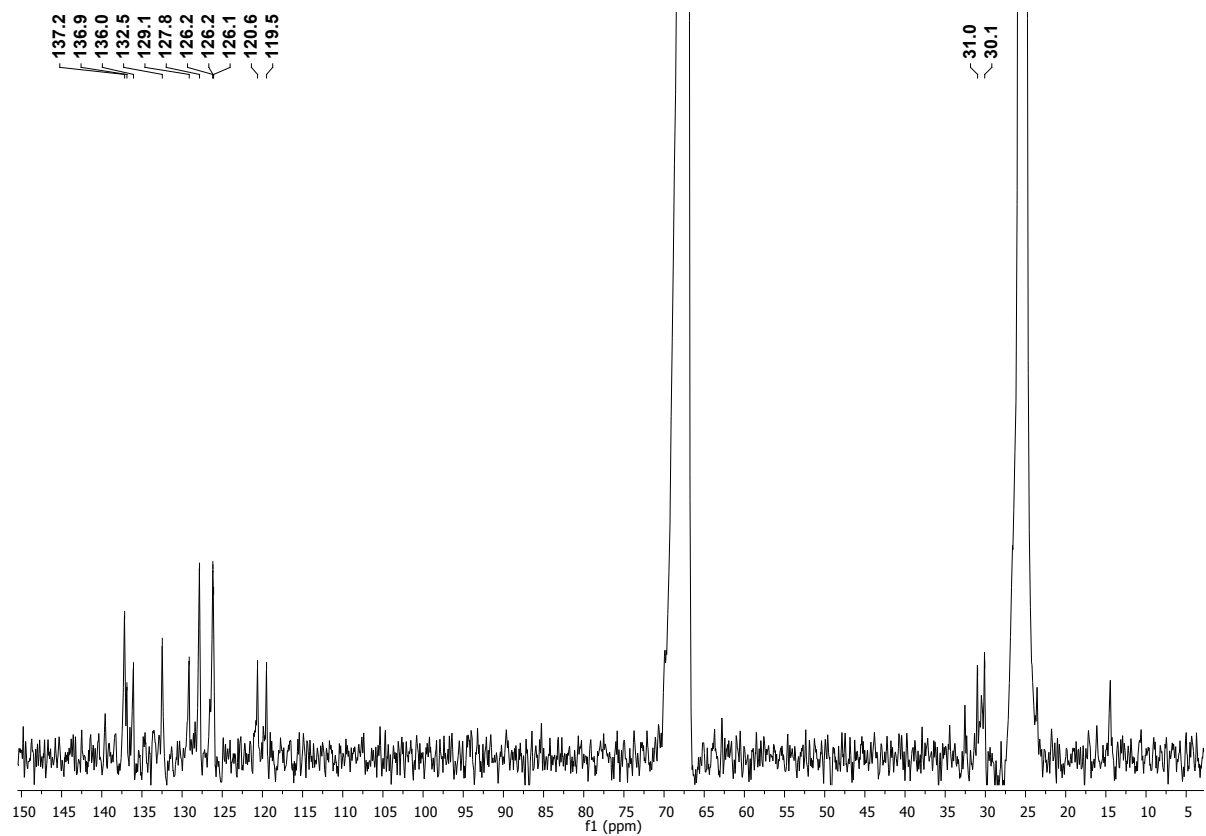

**Figure S6b.**  $^{13}\text{C}\{^1\text{H}\}$ -NMR spectrum (THF- $d_8$ ) of **6** (poor solubility, acquisition time 24 h, decomposition in  $\text{CDCl}_3$  and  $\text{CD}_2\text{Cl}_2$ ).

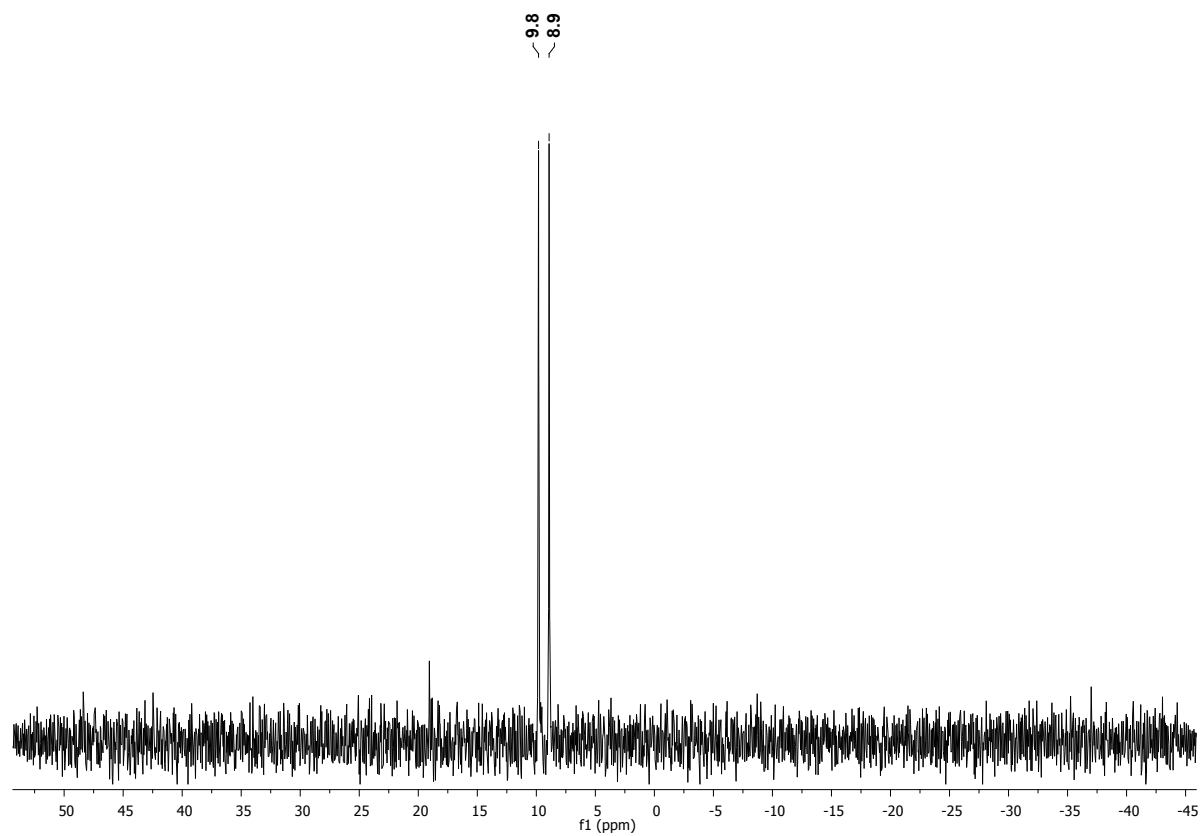

**Figure S6c.**  $^{31}\text{P}\{^1\text{H}\}$ -NMR spectrum (THF- $d_8$ ) of **6**.

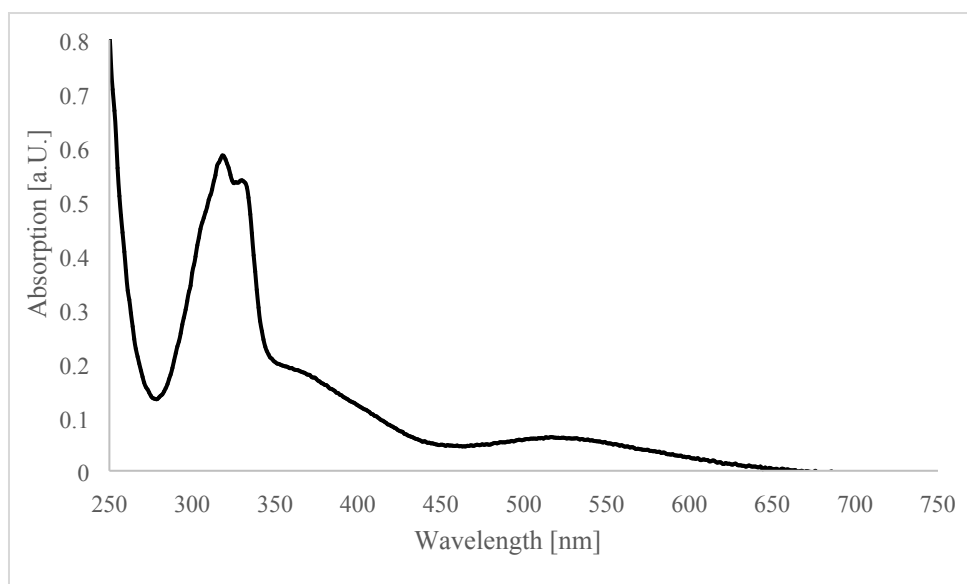

**Figure S6d.** UV/Vis spectrum (THF) of **6**.

**Table S1.** Selected interatomic distances (Å) and angles (°) of **1** and **2**.

|                                                | <b>1</b>  | <b>2</b>  |
|------------------------------------------------|-----------|-----------|
| <b>Bond Lengths and Angles</b>                 |           |           |
| Sb(1)–C(10)                                    | 2.187(2)  | 2.201(2)  |
| Sb(1)–Cl(1)/C(70)                              | 2.632(1)  | 2.192(2)  |
| Sb(1)–C(40)                                    | 2.181(2)  | 2.203(3)  |
| C(10)–Sb(1)–C(40)                              | 93.14(9)  | 96.4(2)   |
| C(10)–Sb(1)–Cl(1)/C(70)                        | 91.68(7)  | 92.6(2)   |
| C(40)–Sb(1)–Cl(1)/C(70)                        | 92.28(7)  | 94.8(4)   |
| <b>peri Region Distances</b>                   |           |           |
| Sb(1)–P(1)                                     | 2.774(1)  | 3.171(1)  |
| Sb(1)–P(2)                                     | 3.266(1)  | 3.229(1)  |
| Sb(1)–P(3)                                     |           | 3.243(1)  |
| <b>peri Region Bond Angles</b>                 |           |           |
| Sb(1)–C(10)–C(19)                              | 121.7(2)  | 125.3(3)  |
| Sb(1)–C(40)–C(49)                              | 126.8(2)  | 126.7(2)  |
| Sb(1)–C(70)–C(79)                              |           | 124.3(3)  |
| C(10)–C(19)–C(18)                              | 126.9(3)  | 129.1(3)  |
| C(40)–C(49)–C(48)                              | 129.4(2)  | 129.1(3)  |
| C(70)–C(79)–C(78)                              |           | 128.9(2)  |
| P(1)–C(18)–C(19)                               | 115.1(2)  | 120.9(2)  |
| P(1)–C(48)–C(49)                               | 117.8(2)  | 121.1(3)  |
| P(1)–C(78)–C(79)                               |           | 120.5(3)  |
| Σ of bay angles                                | 363.7(7)  | 375.3(7)  |
|                                                | 374.0(6)  | 376.9(8)  |
|                                                |           | 373.7(8)  |
| Splay angle <sup>a</sup>                       | 3.7(7)    | 15.3(7)   |
|                                                | 14(6)     | 16.9(8)   |
|                                                |           | 13.7(8)   |
| <b>Out-of-Plane Displacement</b>               |           |           |
| P(1)                                           | 0.271(1)  | 0.016(1)  |
| P(2)                                           | 0.510(1)  | 0.014(1)  |
| P(3)                                           |           | 0.287(1)  |
| Sb(1)                                          | 0.242(1)  | 0.019(1)  |
|                                                | 0.462(1)  | 0.040(1)  |
|                                                |           | 0.652(1)  |
| <b>Central Acenaphthyl Ring Torsion Angles</b> |           |           |
| C: (13)–(14)–(19)–(18)                         | 178.9(3)  | 178.6(3)  |
| C: (43)–(44)–(49)–(48)                         | –173.6(2) | –179.9(4) |
| C: (73)–(74)–(79)–(78)                         |           | 173.4(3)  |
| C: (15)–(14)–(19)–(10)                         | 178.1(3)  | –177.6(3) |
| C: (45)–(44)–(49)–(40)                         | –175.6(3) | –175.4(3) |
| C: (75)–(74)–(79)–(70)                         |           | 176.3(5)  |

<sup>a</sup> Splay angle: sum of the three bay region angles – 360.

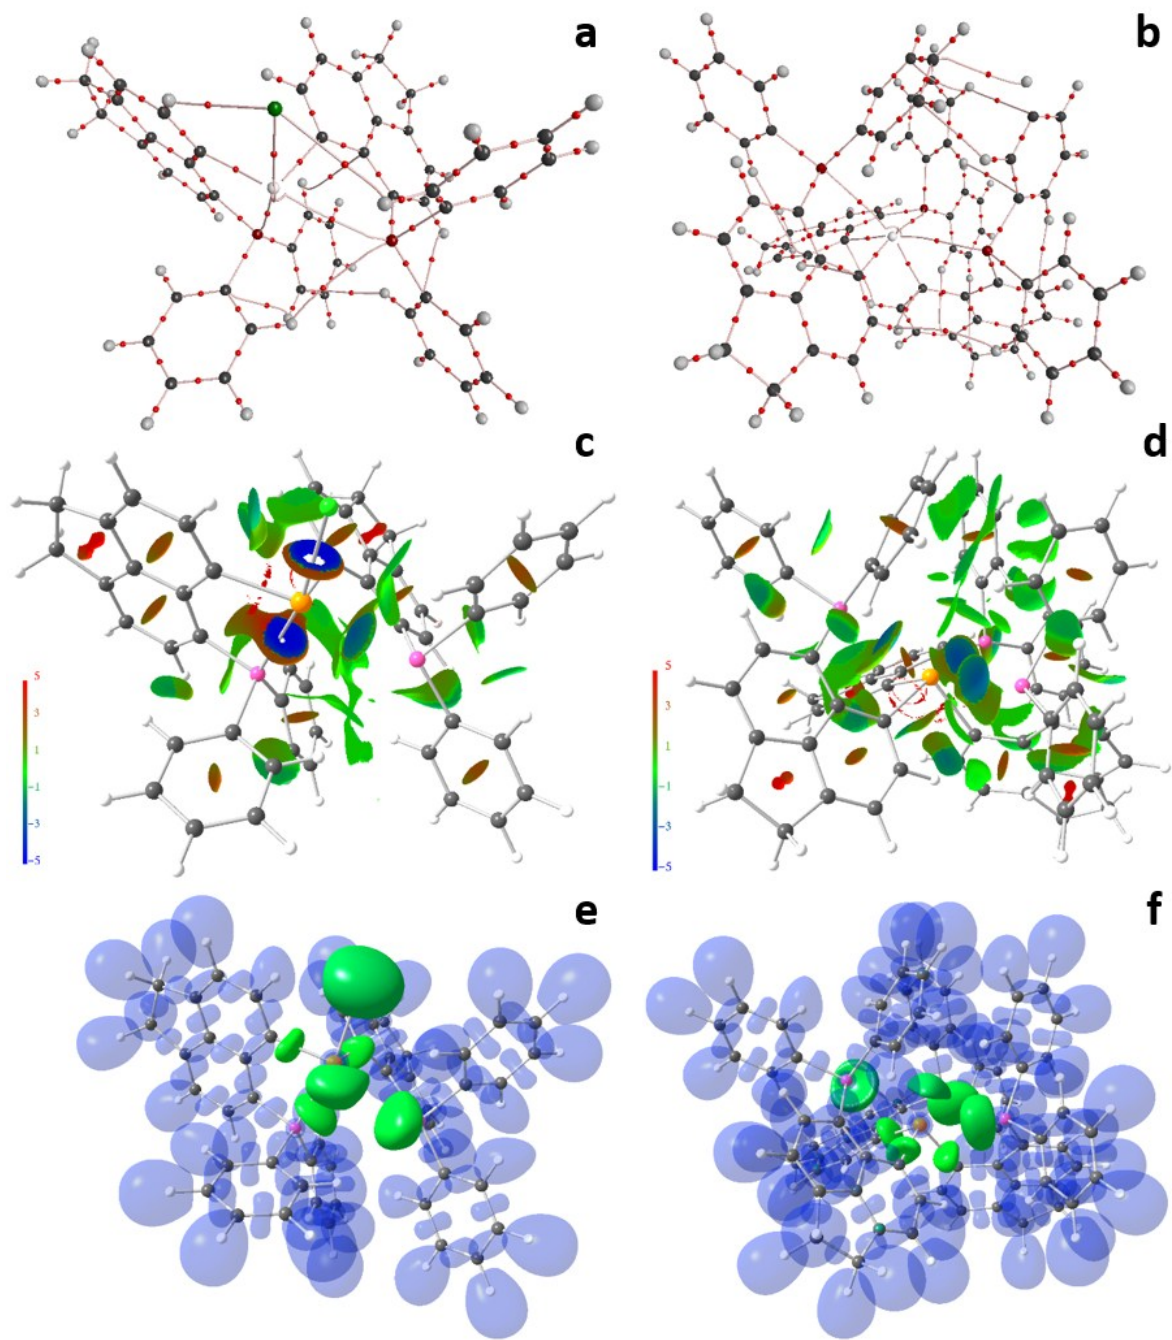

**Figure S7.** AIM topologies, NCI *iso*-surfaces ( $s = 0.5$ ), and ELI-D *iso*-surfaces ( $\gamma = 1.3$ ) of **1** (left column) and **2** (right column).

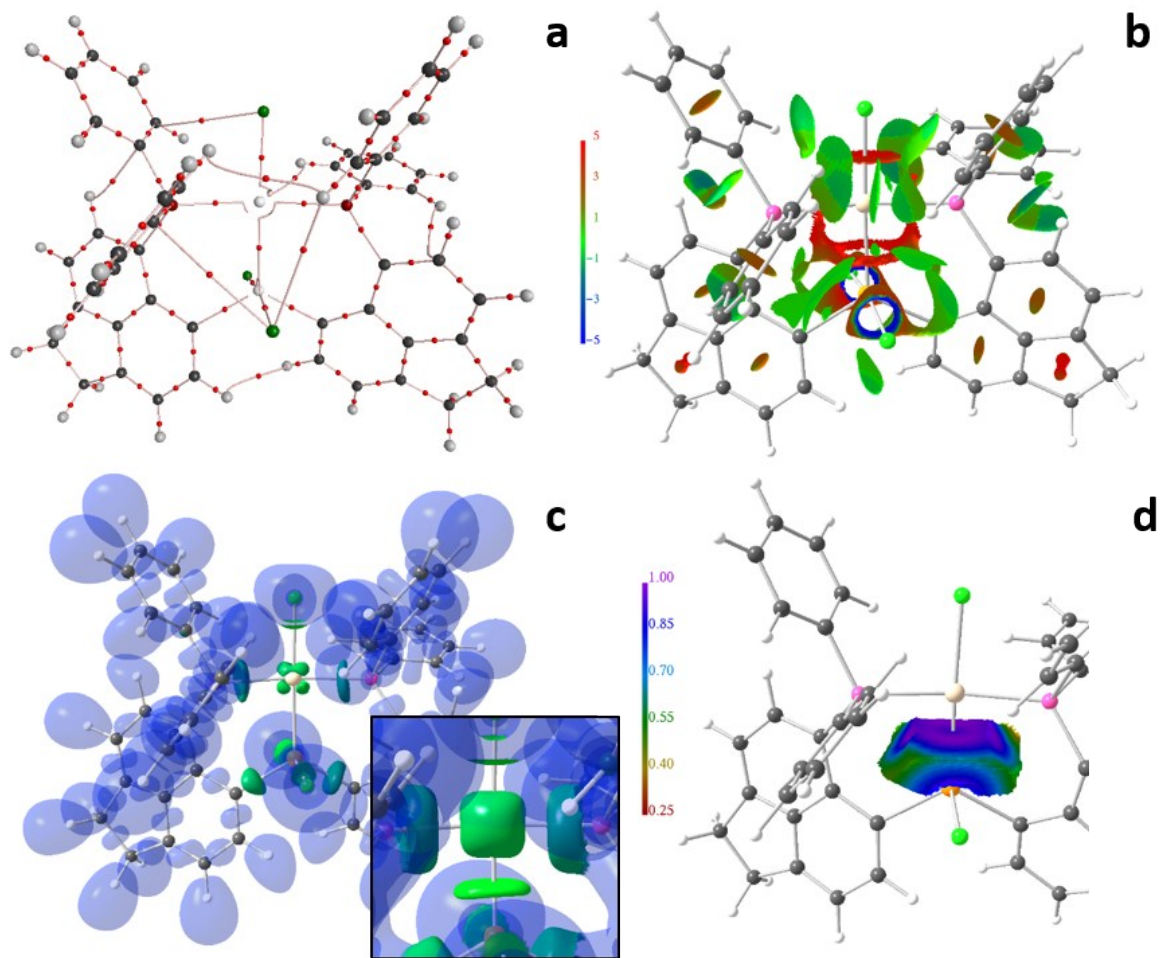

**Figure S8.** AIM topology, NCI *iso*-surface ( $s = 0.5$ ), ELI-D *iso*-surface ( $\gamma = 1.3$ ; inset shows magnification around the metal center at  $\gamma = 1.25$ ), and ELI-D distribution mapped on the Sb-Pt ELI-D basin in **5**.

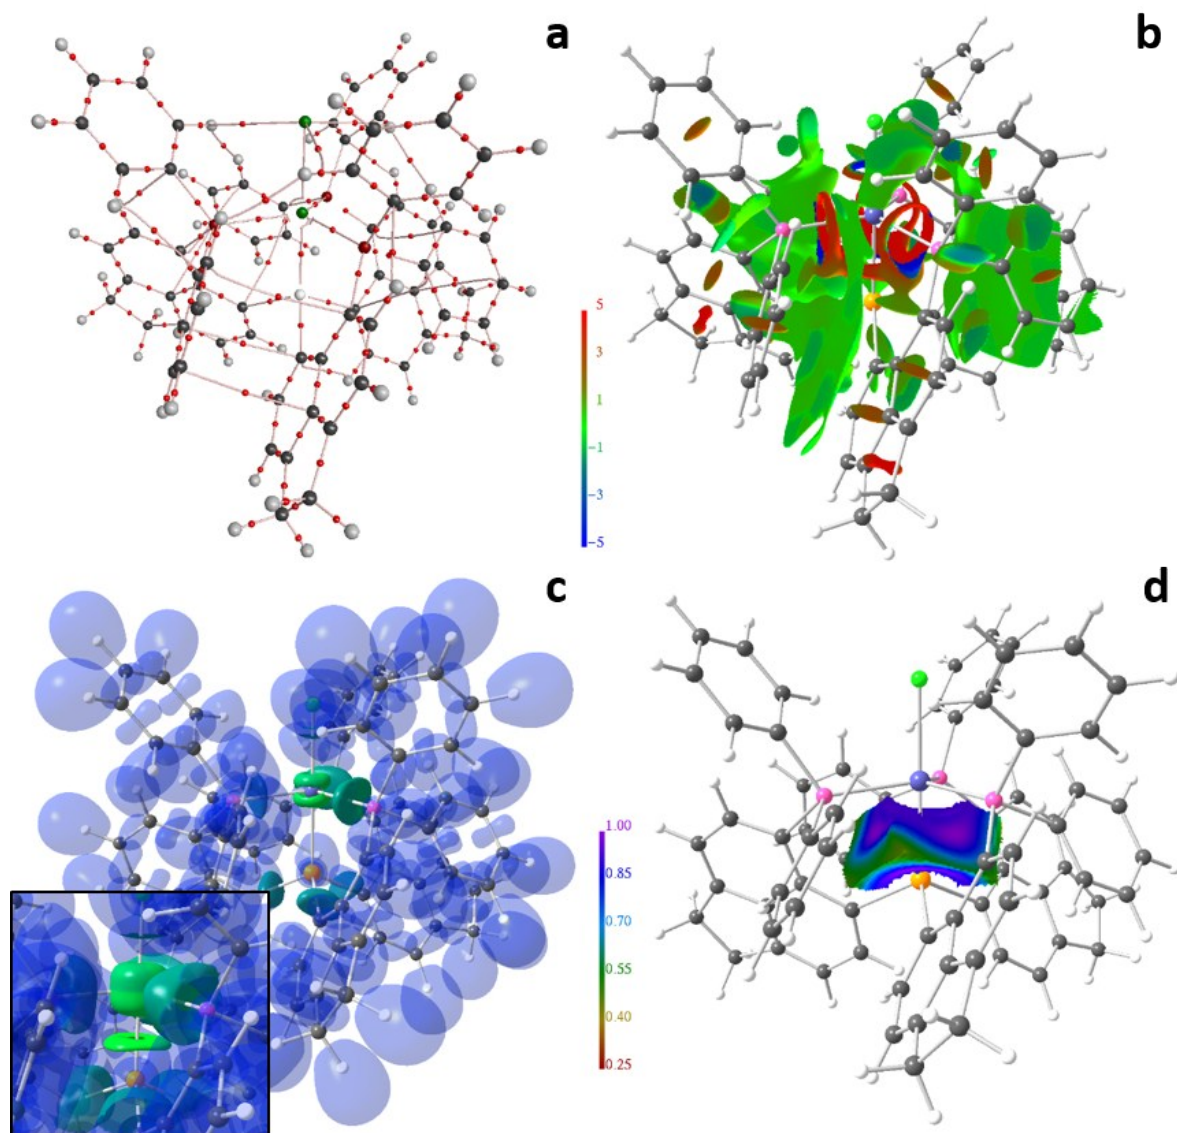

**Figure S9** AIM topology, NCI *iso*-surface ( $s = 0.5$ ), ELI-D *iso*-surface ( $\gamma = 1.3$ ; inset shows magnification around the metal center at  $\gamma = 1.25$ ), and ELI-D distribution mapped on the Sb–Rh ELI-D basin in **6**.
